# Supplementary material for: Exceptional hydrogen evolution in acid enabled by a multi-function-site complex oxide via atomic-scale hydrogen spillover
Source: Research Square preprint supplement (doi:10.21203/rs.3.rs-670823/v1), 2021-07-13
Supplement: Supplementary file 1 [file 9d43281bd5d5f9dbd6da4e80.docx]

**Supporting information**

**Exceptional hydrogen evolution in acid enabled by a multi-function-site complex oxide via atomic-scale hydrogen spillover**

***Dai et al.***


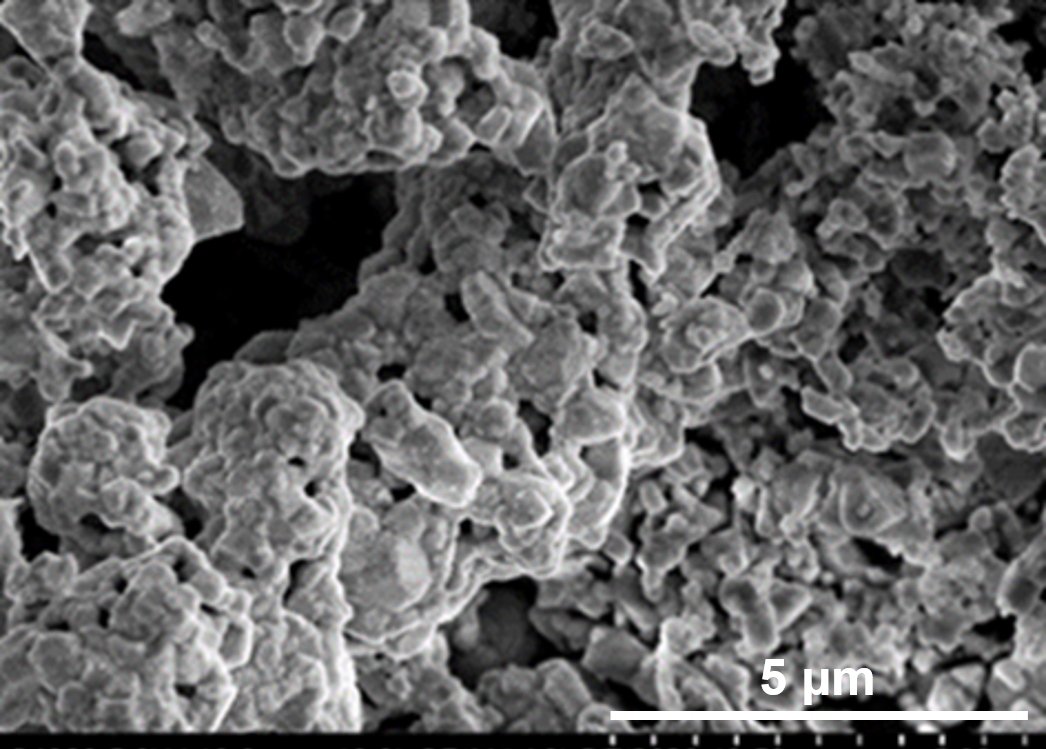


**Supplementary Figure 1.** SEM image of La2Sr2PtO7+δ.


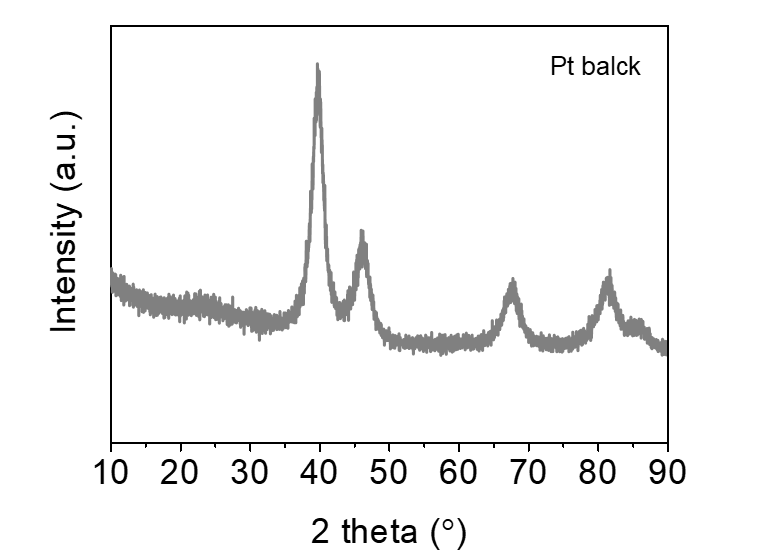


**Supplementary Figure 2.** XRD pattern of Pt black.


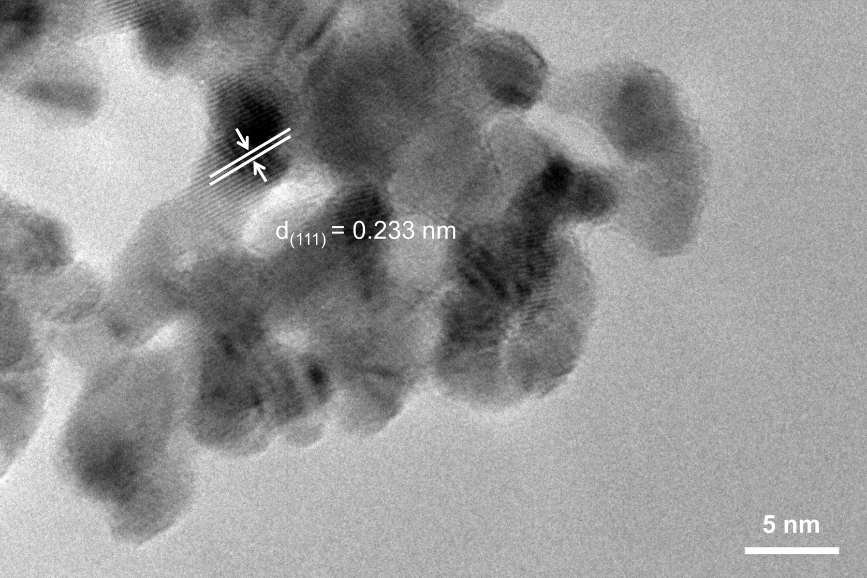


**Supplementary Figure 3**. HRTEM image of Pt black with particle size of about 5nm. The lattice spacing is about 0.233 nm for (111) plane.


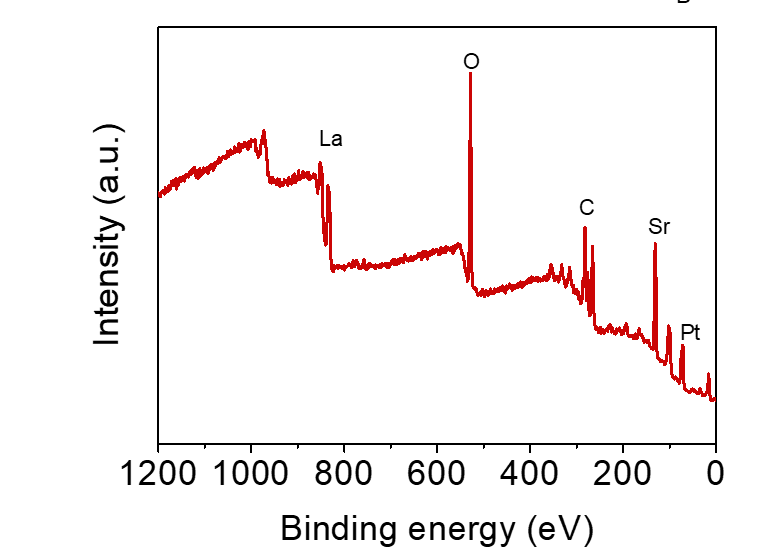


**Supplementary Figure 4.** XPS survey of La2Sr2PtO7+δ.


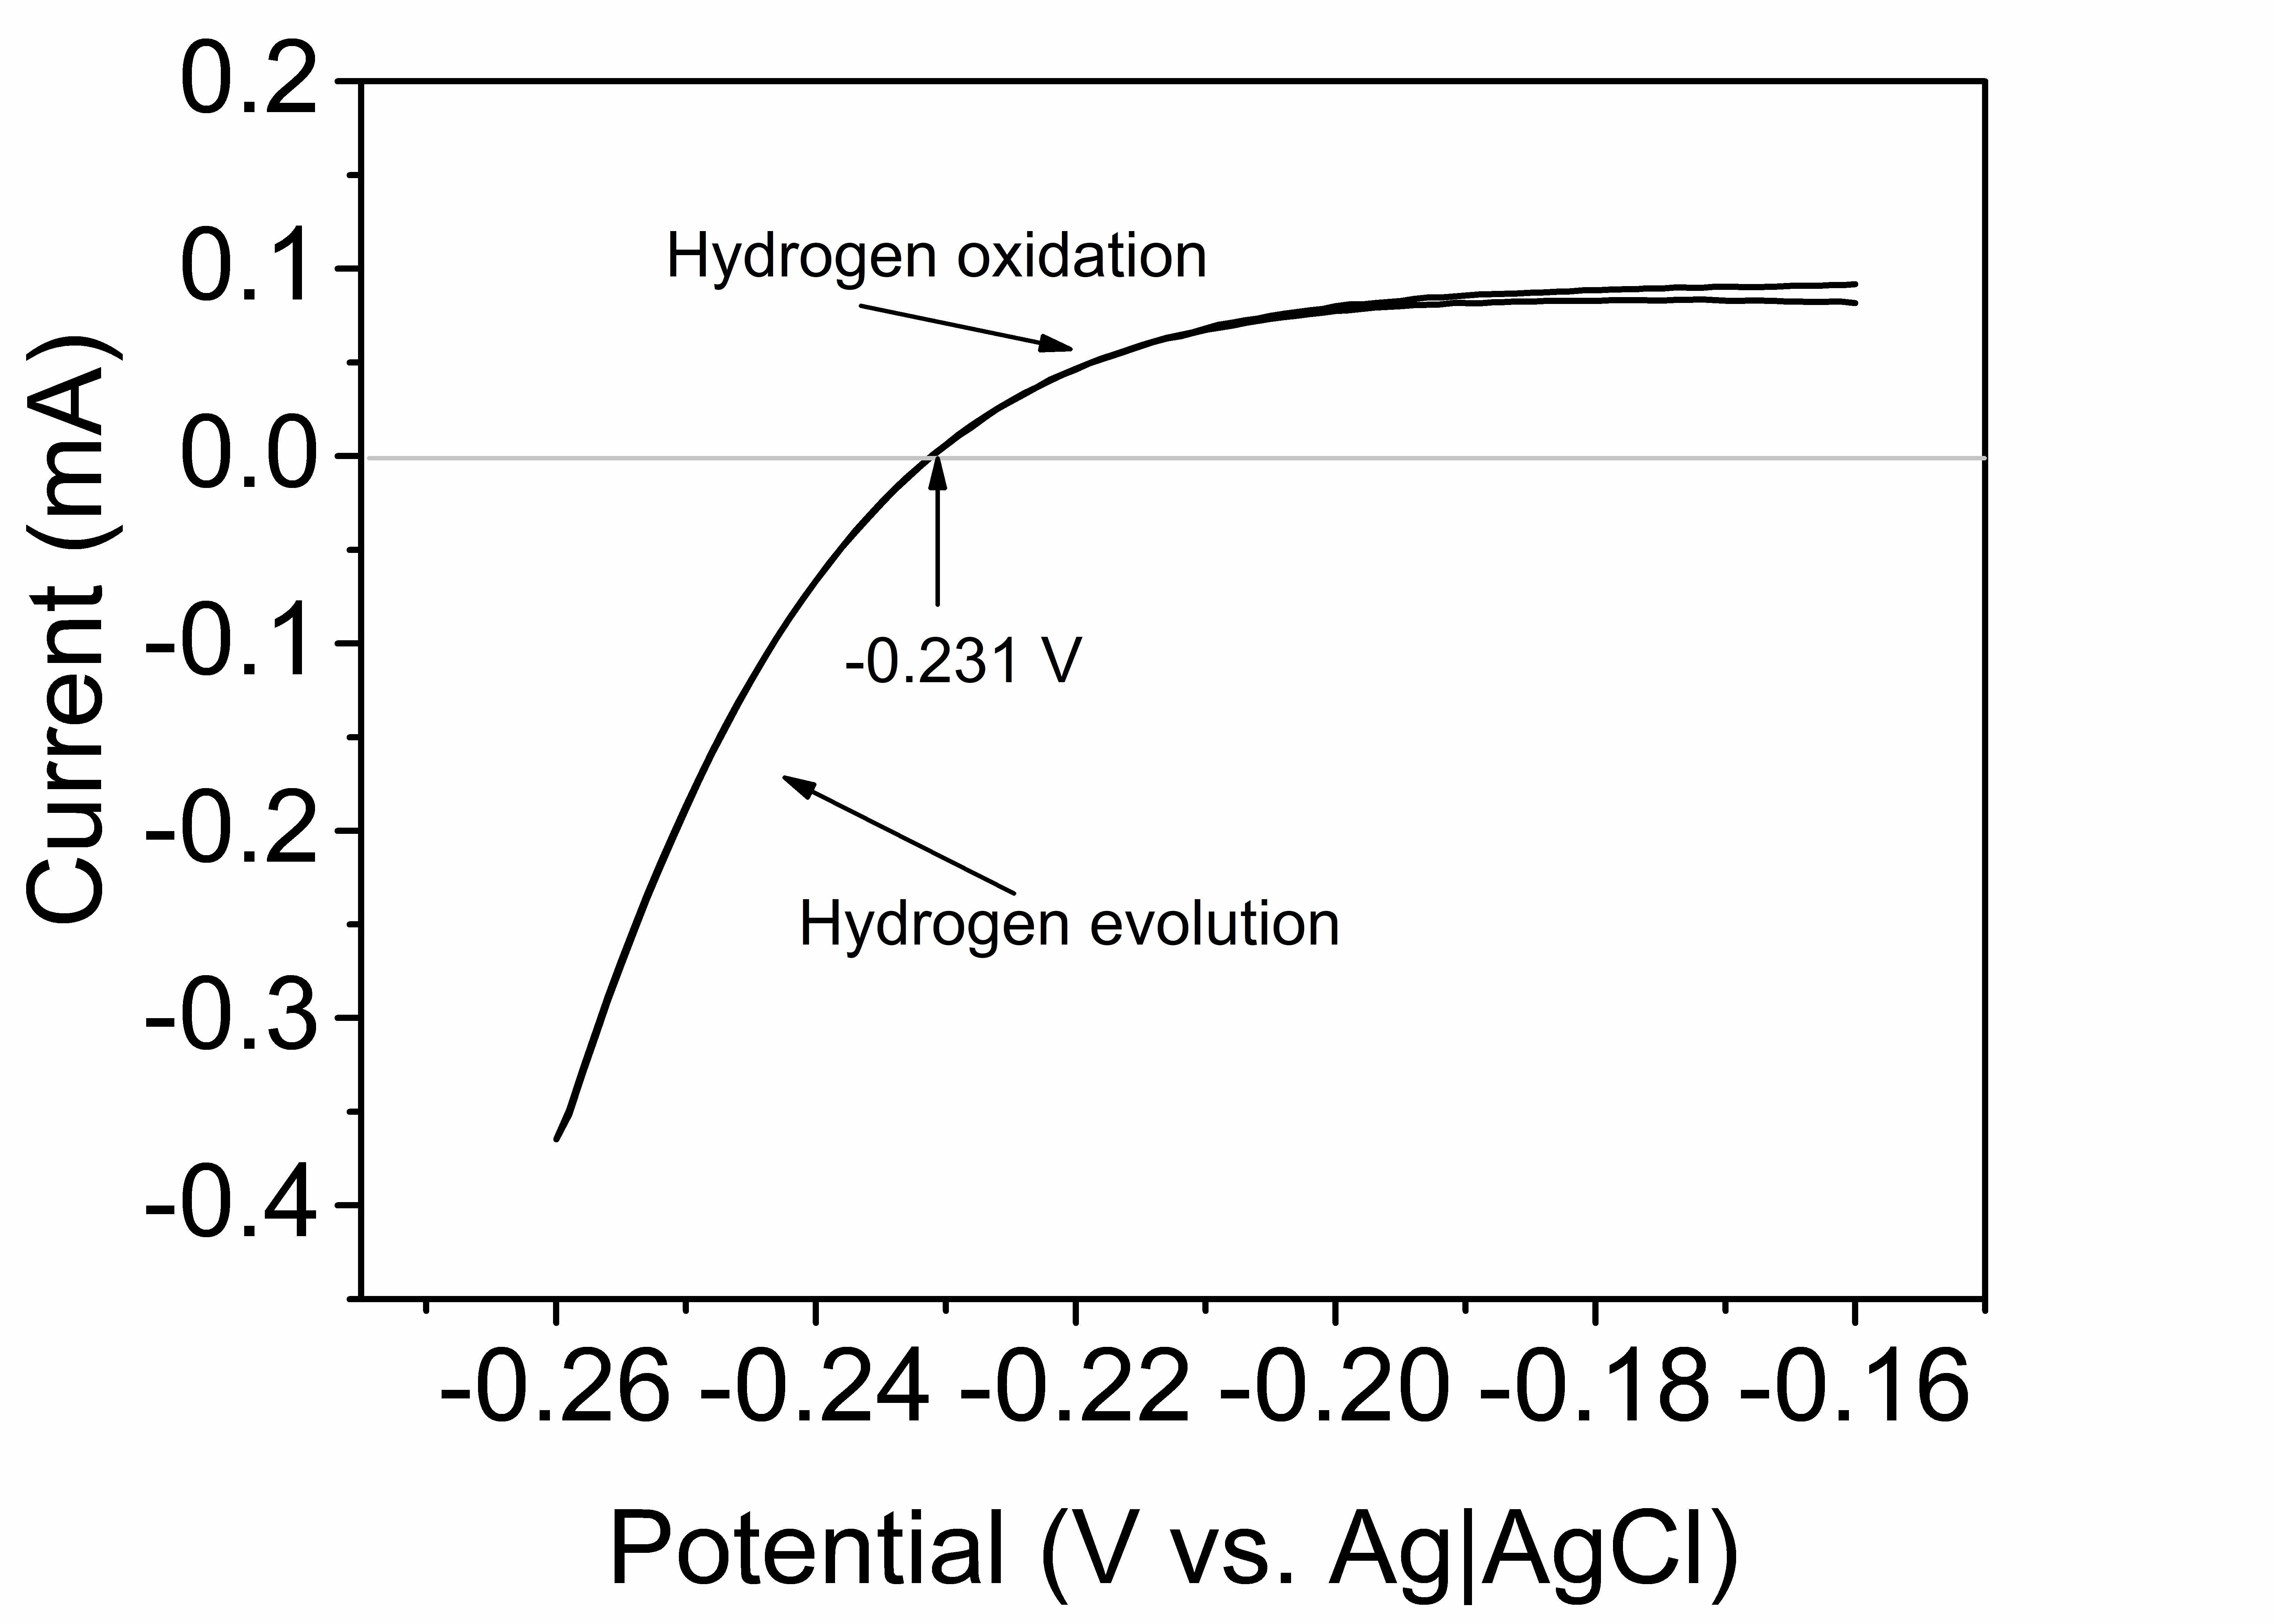


**Supplementary Figure 5.** RHE calibration.RHE calibration of the Ag|AgCl reference electrode in 0.5 M H2SO4. The calibration process was performed in a high purity H2-saturated 0.5 MH2SO4with a platinum RDE (PINE, 0.126 cm2) as the working electrode, Pt foil as the counter electrode, and Ag|AgCl (3.5 M KCl) as the reference electrode. Cyclic voltammetry (CV) was conducted at a scan rate of 1 mV s-1, and the average of the two potentials at whichthe current crossed zero was taken as the thermodynamic potential for the hydrogen electrode reaction. In 0.5 MH2SO4 solution, ERHE = EAg|AgCl +0.231 V.


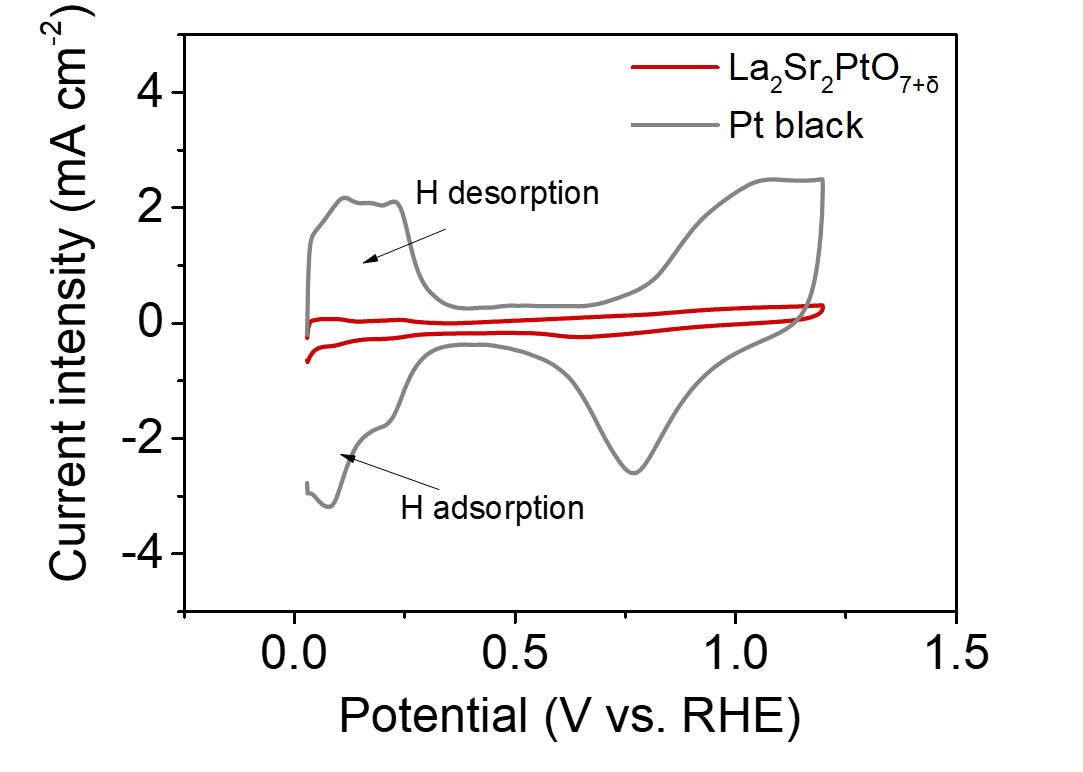


**Supplementary Figure 6.** Cyclic voltammetry curves of La2Sr2PtO7+δ and Pt black.


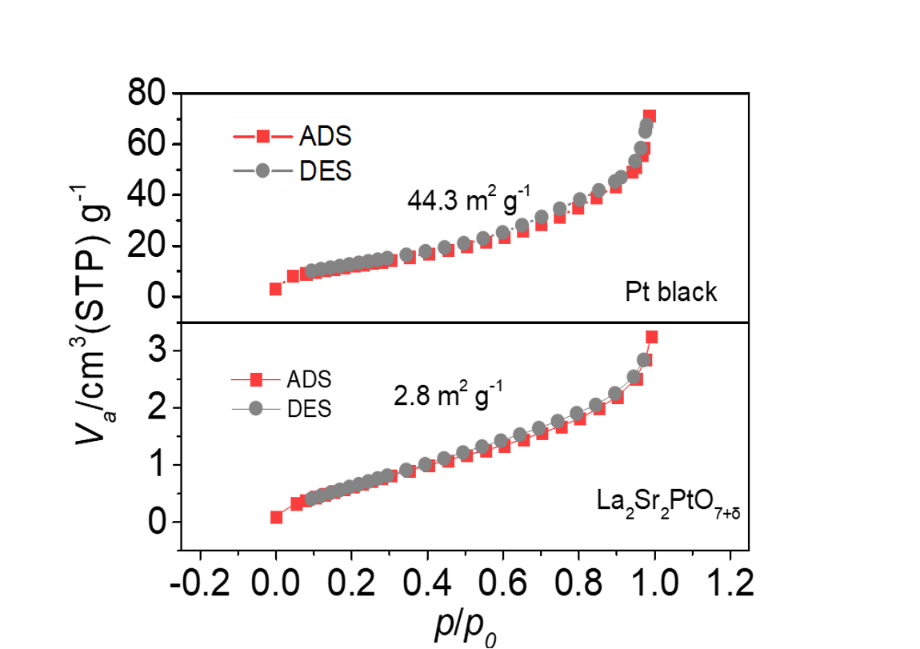


**Supplementary Figure 7.** N2 adsorption-desorption isotherm of Pt black and La2Sr2PtO7+δ.


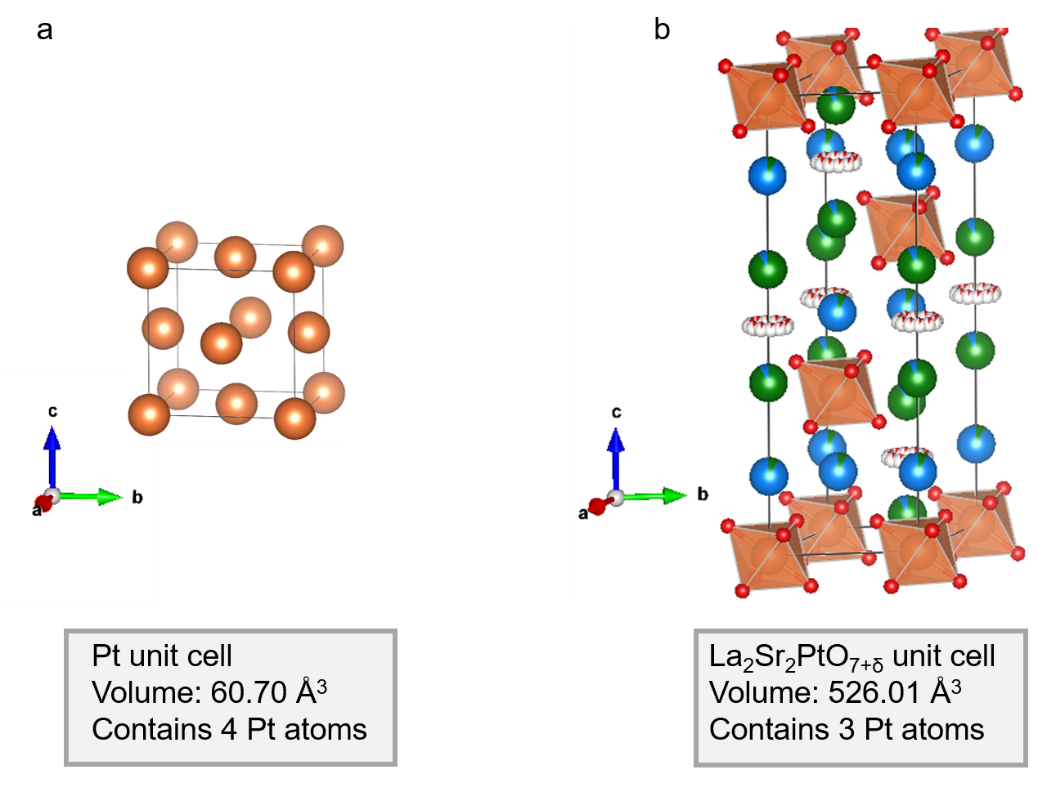


**Supplementary Figure 8.** Unit cell of catalysts. (a) Pt black and (b) La2Sr2PtO7+δ.

**Supplementary Figure 9.** XRD patterns of La2Sr2PtO7+δ before and after different CV cycles during HER.


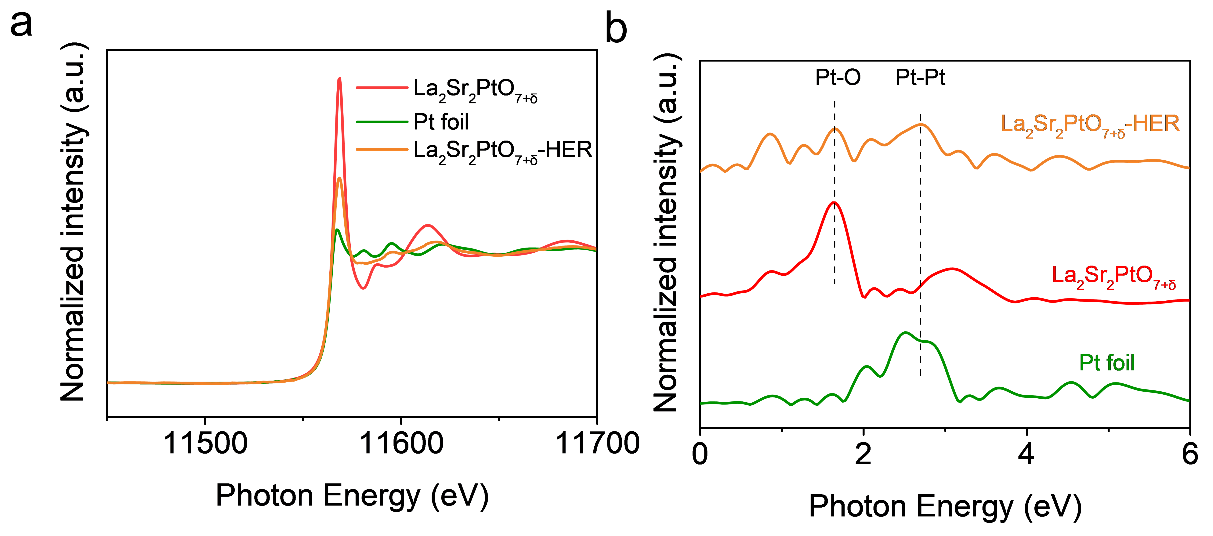


**Supplementary Figure 10.** (a) Pt *L*3-edge XANES spectra of La2Sr2PtO7+δ before and after 1000 cycles during HERas well as Pt foil. (b) *K3*-weighted Fourier transform EXAFS spectra of the La2Sr2PtO7+δbefore and after 1000 cycles during HER as well as Pt foil.


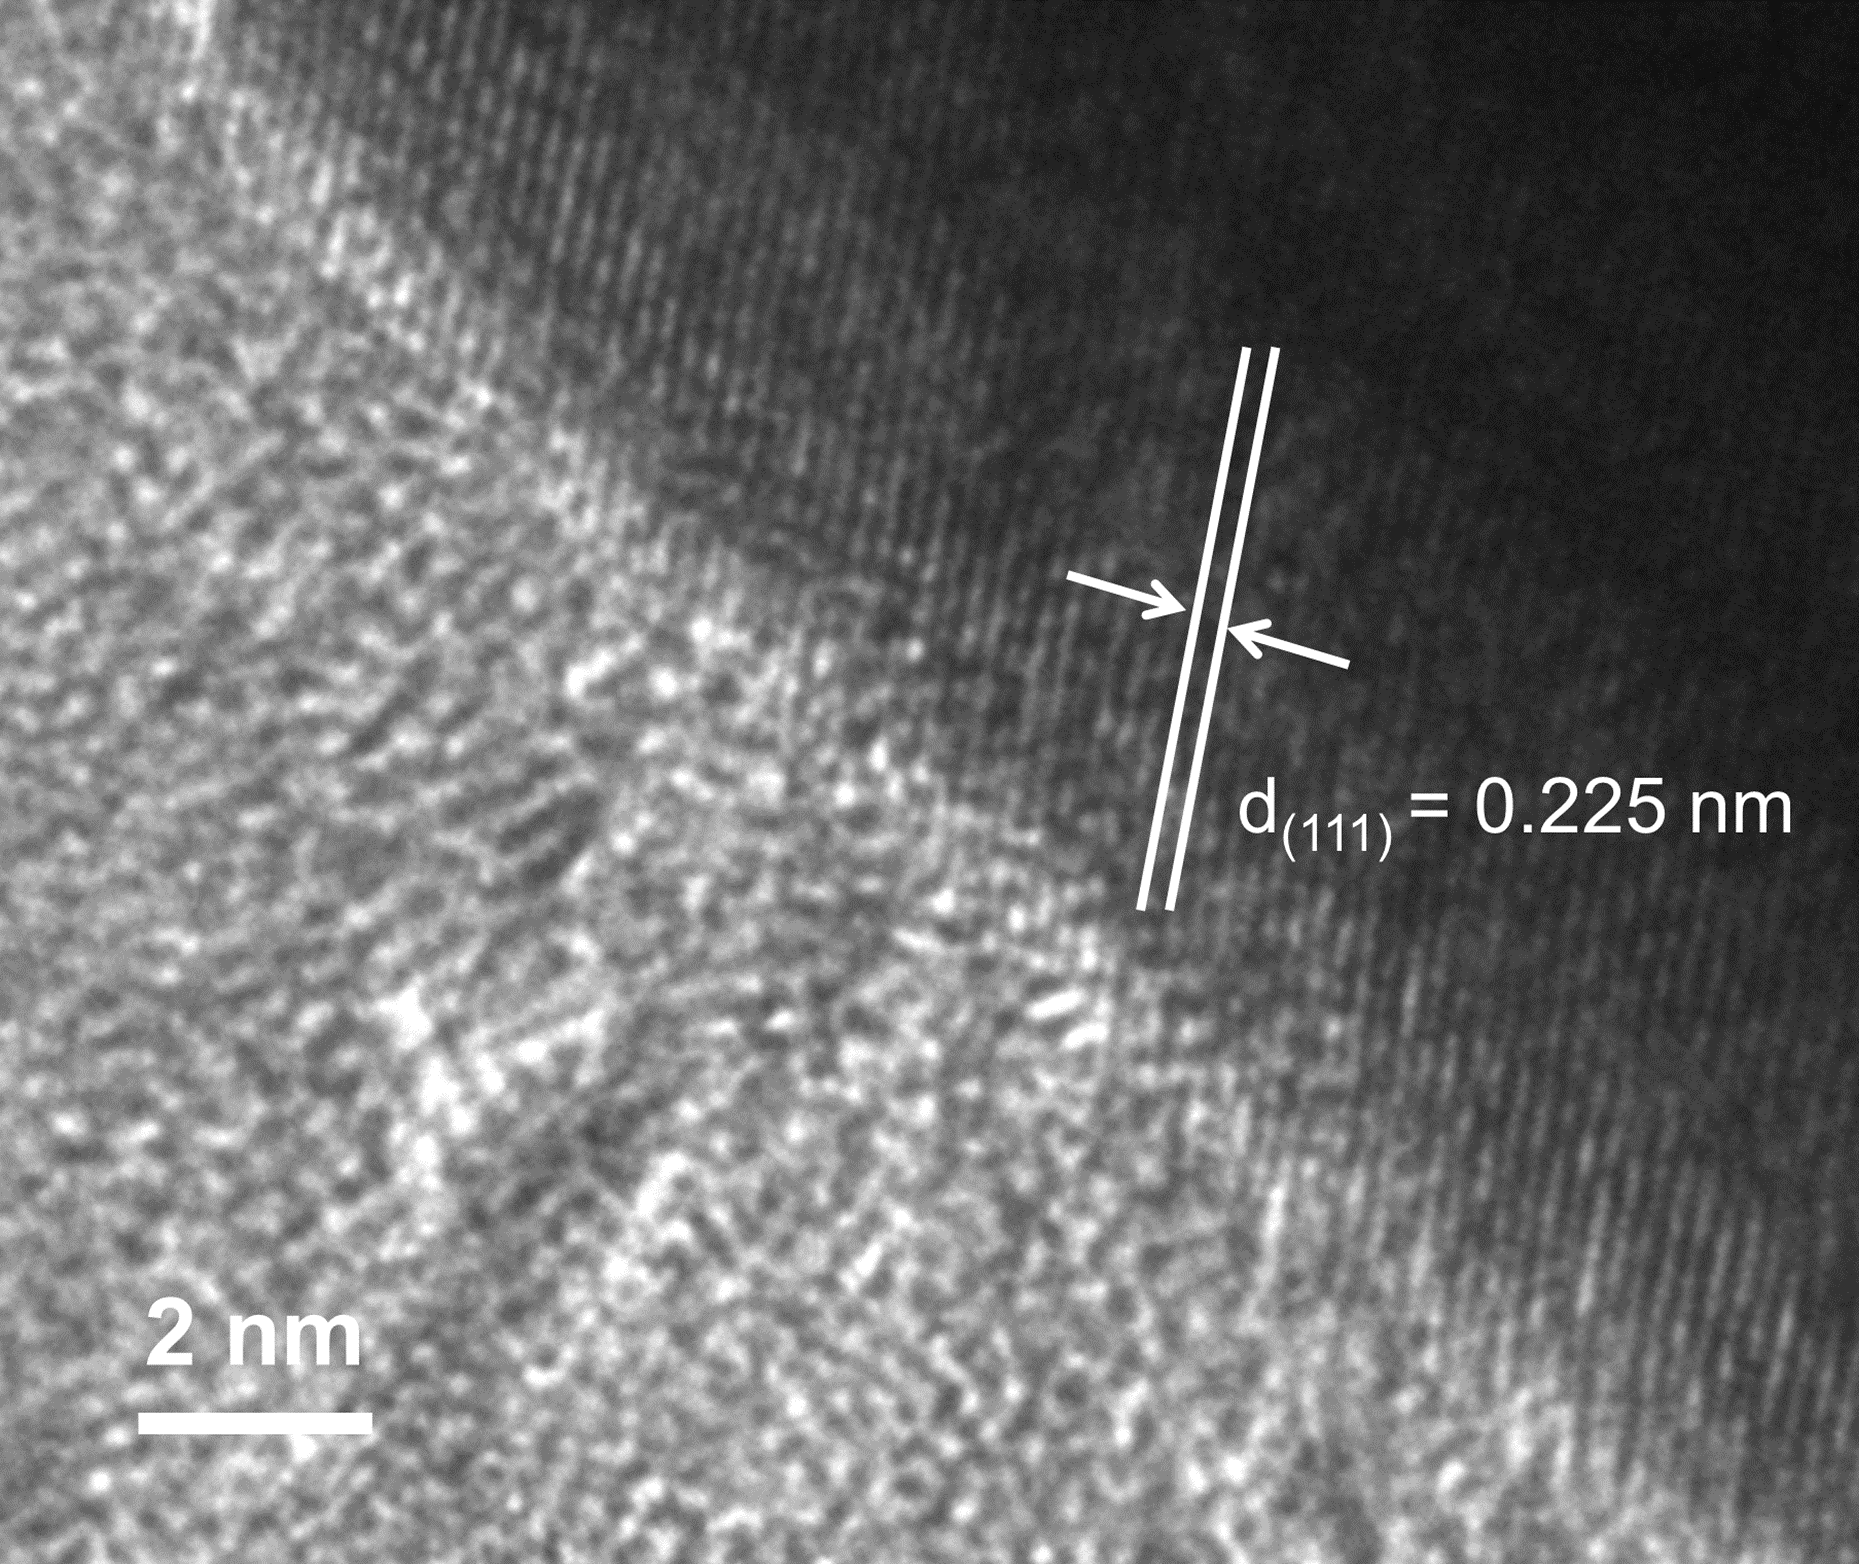


**Supplementary Figure 11.** HRTEM image of post-ADT La2Sr2PtO7+δ.


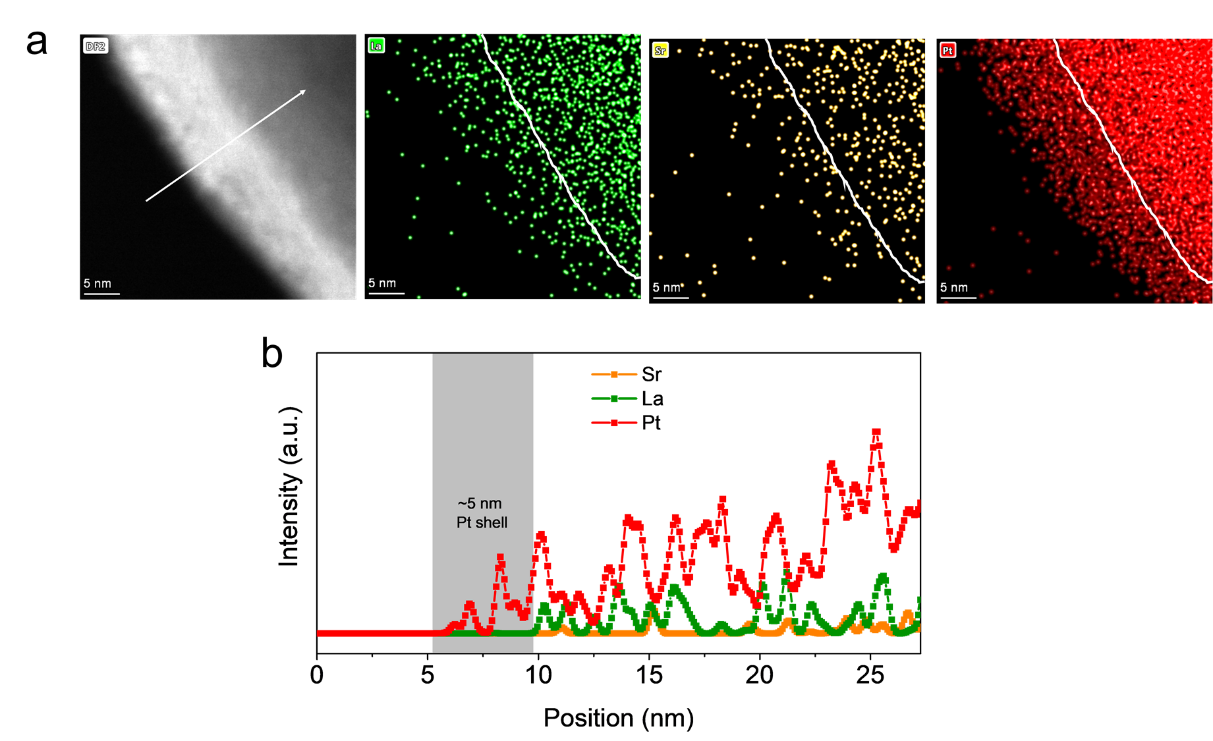


**Supplementary Figure 12.** (a) HAADF-STEM and the corresponding elemental mapping images of post-ADT La2Sr2PtO7+δ. (b) STEM-EDS spectrum of post-ADT La2Sr2PtO7+δ.


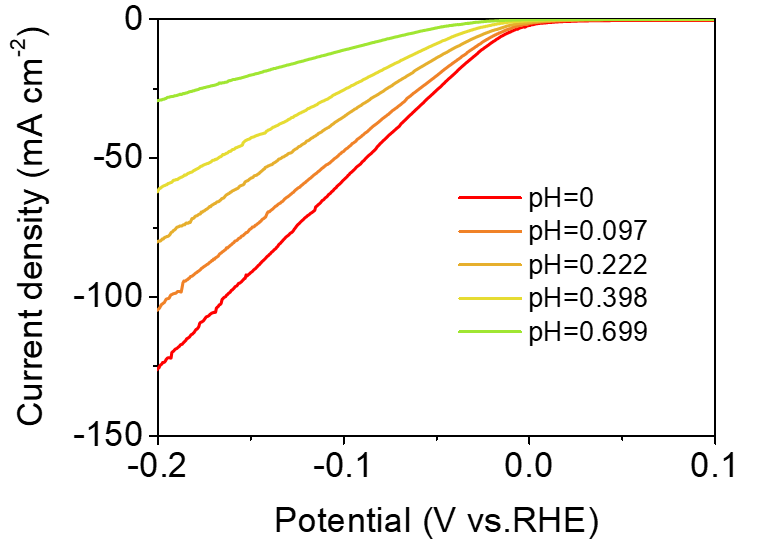


**Supplementary Figure 13.** LSV curves of La2Sr2PtO7+δ in Ar-saturated H2SO4 electrolyte with pH ranging from 0 to 0.68.

**Supplementary Table 1**. Atomic coordinates, isotropic displacement parameters and cell parameters for La2Sr2PtO7+δ.

| Site | Np | x | y | z | Occ |
| --- | --- | --- | --- | --- | --- |
| Pt | 3a | 0 | 0 | 0 | 1 |
| La1 | 6c | 0 | 0 | 0.6233 | 0.915 |
| Sr1 | 6c | 0 | 0 | 0.6233 | 0.085 |
| La2 | 6c | 0 | 0 | 0.1731 | 0.085 |
| Sr2 | 6c | 0 | 0 | 0.1731 | 0.915 |
| O1 | 18f | 0.3145 | 0.2169 | 0.0621 | 1 |
| O2 | 18f | 0.1258 | 0 | 0.5 | 0.082 |
| O3 | 18f | 0.1452 | 0.0726 | 0.5 | 0.082 |

Space group: *R, a**=b=*5.7913(2) Å*, c=*18.1097(7) Å, V= 526.0149(5) Å3, *R*wp = 8.85,*R*p = 6.80, χ2 = 1.40.

**Supplementary Table 2**. HER activity comparison between La2Sr2PtO7+δ and reported hydrogen spillover-based binary-component catalysts (HSBCCs) and state-of-the-art Pt-based catalysts in 0.5 M H2SO4.

| **Catalysts** | **Substrate** | **Mass loading (mg·cm-2)** | ***η* @10 mA**  **cm-2 (mV)** | | **Tafel slope (mV dec-1)** | **Ref** |
| --- | --- | --- | --- | --- | --- | --- |
| **La2Sr2PtO7+δ** | **Glass carbon** | **0.232** | **13** | | **22** | **This work** |
| **Pt-group metal based catalysts** | | | | | | |
| Pt@C2N | Glass carbon | 0.285 | ~40 | | 33 | *Nat. Nanotech.*, 2017, 12, 441 |
| PtRu@RFCS | Glass carbon | 0.354 | 20 | | 27.2 | *Energy Environ. Sci.*, 2018, 11, 1232 |
| Pt1/N-C | Glass carbon | 0.250 | 19 | | 14 | *Nat. Commun.*, 2020, 11, 1029 |
| Mo2TiC2T*x*-PtSA | Glass carbon | 1 | 30 | | 30 | *Nat. Catal.*,  2018, 1, 985 |
| Pt@PCM | Glass carbon | NA | 105 | | 64 | *Sci. Adv.*, 2016, 2, e1501602 |
| Pt/np-Co0.85Se | Glass carbon | 2.5 | 55 | | 35 | *Nat. Commun.*, 2019, 10, 1743 |
| Pd/Cu-Pt NRs | Glass carbon | 0.2 | 23 | | 25 | *Angew. Chem. Int. Ed.*, 2017, 56, 16047 |
| ALD50Pt/NGNs | Glass carbon | 0.077 | ~38 | | 29 | *Nat. Commun.*, 2016, 7, 13638 |
| Pt1/OLC | Glass carbon | 0.510 | 38 | | 35 | *Nat. Energy*,  2019, 4, 512 |
| Pt-GT-1 | Glass carbon | 0.280 | 18 | | 24 | *Nat. Energy*,  2018, 3, 773 |
| PtNC/S-C | Glass carbon | 0.051 | 11 | | 24 | *Nat. Commun.*, 2019, 10, 4977 |
| PtW6O24/C | Glass carbon | NA | 22 | | 30 | *Nat. Commun.*, 2020, 11, 490 |
| **Hydrogen spillover-based binary-component catalysts (HSBCCs)** | | | | | | |
| Rh/SiNW | Glass carbon | 0.193 | | ~80 | 24 | *Nat. Commun.*, 2016, 7, 12272 |
| Rh-MoS2 | Glass carbon | 0.309 | | 47 | 24 | *Adv. Funct. Mater.*, 2017, 27, 1700359 |
| Ir/SiNW | Glass carbon | 0.339 | | 20 | 22 | *ACS Nano*,  2019, 13, 2786 |
| Pt/CoP | Glass carbon | 0.102 | | 21 | 43 | *Energy Environ. Sci.*, 2019, 12, 2298 |
| Pt-SA/ML-WO3 | Glass carbon | 0.56 | | 22 | 27 | *Adv. Funct. Mater.*, 2021, 2009770 |
| Pt-WO3 | Glass carbon | 0.141 | | 39 | 33 | *Nano Energy*,  2020, 71, 104653 |
| Pt SA/m-WO3−*x* | Glass carbon | 0.196 | | 47 | 45 | *Angew. Chem. Int. Ed.*, 2019, 58, 16038 |
| Pt/RuCeOx-PA | Glass carbon | 0.388 | | 45 | 31 | *Angew. Chem. Int. Ed.*, 2020, 59, 20423 |
| *VO*-Pt/TiO2 | Glass carbon | 0.238 | | ~60 | 33 | *Angew. Chem. Int. Ed.*, 2020, DOI:10.1002/anie.202104856 |

**Supplementary Note 1.** Turnover frequency calculations

The active sites per real surface area are calculated from the following formula:

No. of active sites =

From Figure S8, we can calculate the number of active sites per surface area for Pt and La2Sr2PtO7+δ:

No. of active sites (Pt) = = 1.637× atoms cm-2
No. of active sites (La2Sr2PtO7+δ) = = 3.192× atoms cm-2

The real surface area for HER is calculated from the electrochemical active surface area (ECSA), which can be determined by integratingthe charge of hydrogen underpotential deposition (HUPD) in cyclic voltammogram (CV) curves according to previous studies.1, 2 The HUPD integrated areas of La2Sr2PtO7+δand Pt black are 1.99 m2/gPt and 70.11 m2/gPt, respectively.

Finally, the plot of current density can be converted into a TOF plot according to the following formula:

TOF=

where I is the current (A) during linear sweep measurement, F is the Faraday constant (C mol-1),n is the number of active sites (mol). The factor 1/2 is based on the consideration that two electronsare required to form one hydrogen molecule.

**Supplementary References**

1. B. Lim, M. Jiang, P. H. C. Camargo, E. C. Cho, J. Tao, X. Lu, Y. Zhu, Y. Xia, *Science***2009**,*324*, 1302.
2. M. Li, Z. Zhao, T. Cheng, A. Fortunelli, C. Y. Chen, R. Yu, Q. Zhang, L. Gu, B. V. Merinov, Z. Lin, E. Zhu, T. Yu, Q. Jia, J. Guo, L. Zhang, W. A. Goddard III, Y. Huang, X. Duan, *Science***2016**, *354*, 1414.
